# Supplementary material for: Alternative approaches for clinical clerkship during the COVID-19 pandemic: Online clinical practice for inpatients and outpatients—A mixed method
Source: Research Square preprint supplement (doi:10.21203/rs.3.rs-68477/v2), 2020-11-11
Supplement: Supplementary file 1 [file 37627a6c883333b1cfded778.docx]

**Supplementary Table**

**Supplementary Table 1. Interview guidelines.**

| 1. Introductory conversation | Thanks, purpose of this study, informed consent, permission to record on audiotape. |
| --- | --- |
| 1. Lead the interview using the follow questions   (note: care should be taken to respect the flow of discussion) | 1. Please introduce yourself. |
| 1. Think of the advantages of online clinical clerkship. Why do you feel that this is an advantage? |
| 1. Think of the disadvantages of online clinical clerkship. Why do you feel that this is a disadvantage? |
| 1. Conclusion | Would anybody like to say anything else about this topic? |
